# Supplementary material for: An Amazingly Simple, Fast and Green Synthesis Route to Polyaniline Nanofibers for Efficient Energy Storage
Source: PubMed Central journal article supplement (PMC7600561; doi:10.3390/polym12102212), 2020-09-27
Supplement: polymers-12-02212-s001.pdf [file polymers-12-02212-s001.pdf]

# An Amazingly Simple, Fast and Green Synthesis Route to Polyaniline Nanofibers for Efficient Energy Storage

Sami ur Rahman <sup>1</sup>, Philipp Röse <sup>2</sup>, Anwar ul Haq Ali Shah <sup>3</sup>, Ulrike Krewer <sup>2\*</sup> and Salma Bilal <sup>1\*</sup>

<sup>1</sup> National Centre of Excellence in Physical Chemistry 1, University of Peshawar, 25120 Peshawar, Pakistan; [samiurrahman364@yahoo.com](mailto:samiurrahman364@yahoo.com) (S.R)

<sup>2</sup> Karlsruhe Institute of Technology (KIT), Institute for Applied Materials – Materials for Electrical and Electronic Engineering (IAM), 76131 Karlsruhe, Germany; [ulrike.krewer@kit.edu](mailto:ulrike.krewer@kit.edu) (U.K)

<sup>3</sup> Institute of Chemical Science, University of Peshawar, 25120 Peshawar, Pakistan; [anwarulhaqalishah@uop.edu.pk](mailto:anwarulhaqalishah@uop.edu.pk) (A.A.S)

\* Correspondence: [salmabilal@uop.edu.pk](mailto:salmabilal@uop.edu.pk); Tel.: 0049-531-39163651 or 0092-919216766 (S.B.); [ulrike.krewer@kit.edu](mailto:ulrike.krewer@kit.edu); Tel: +49 721 608-47569 (U.K.)

## 1. PANI-Synthesis

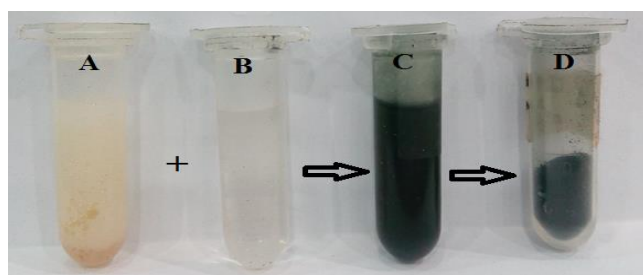

**Figure S1:** Synthesis of sodium phytate doped PANI.

**Table S1.** Comparison of selected synthesis methods for polyaniline nanofibers with sodium phytate as dopant.

| Method                         | Solvent               | Route                                                                                                                    | Equipment                                                             | Time for final product |
|--------------------------------|-----------------------|--------------------------------------------------------------------------------------------------------------------------|-----------------------------------------------------------------------|------------------------|
| Electrochemical <sup>[1]</sup> | Organic/<br>Inorganic | Toxic (aqueous or non-aqueous electrolytes such as H <sub>2</sub> SO <sub>4</sub> , HCl, acetonitrile etc. are employed) | Cell development<br>Electrodes,<br>Potentiostat,<br>electrical energy | More than<br>50 hours  |
| Chemical <sup>[2]</sup>        | Organic/<br>Inorganic | Toxic (chloroform, toluene, acetone, acids, etc are largely consumed)                                                    | Magnetic stirrer,<br>extensive glass<br>wares, electrical<br>energy   | More than<br>120 hours |
| Present                        | Water                 | Green (no electrolyte or organic solvents required)                                                                      | Eppendorf's tubes<br>only                                             | 5-10<br>minutes        |

## 2. Results of the BET and BJH-Experiments

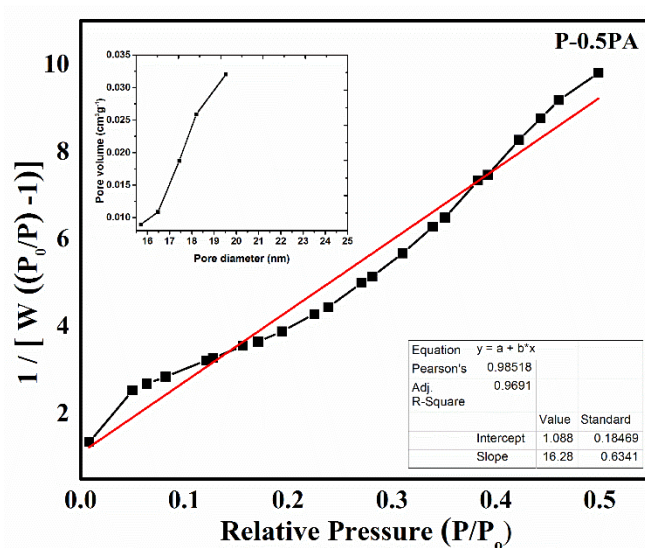

**Figure S2.** Nitrogen adsorption Curve of PANI-S1 while the inset curve shows pore size distribution and pore volume.

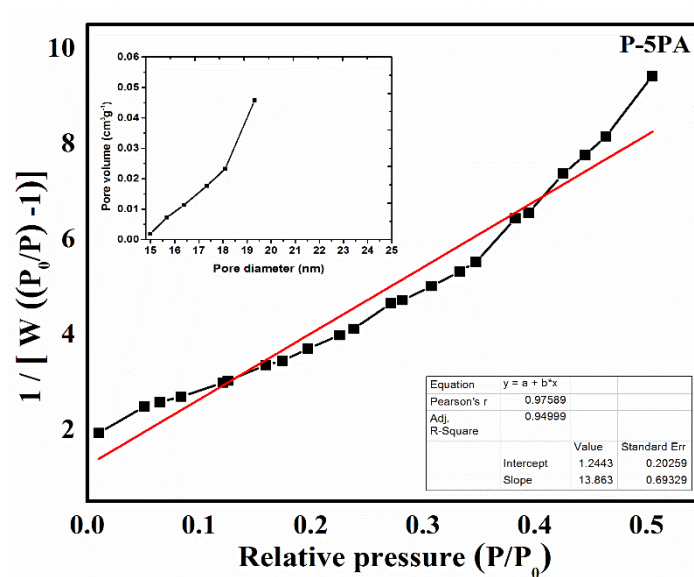

**Figure S3.** Nitrogen adsorption Curve of PANI-S4 while the inset curve shows pore size distribution and pore volume.

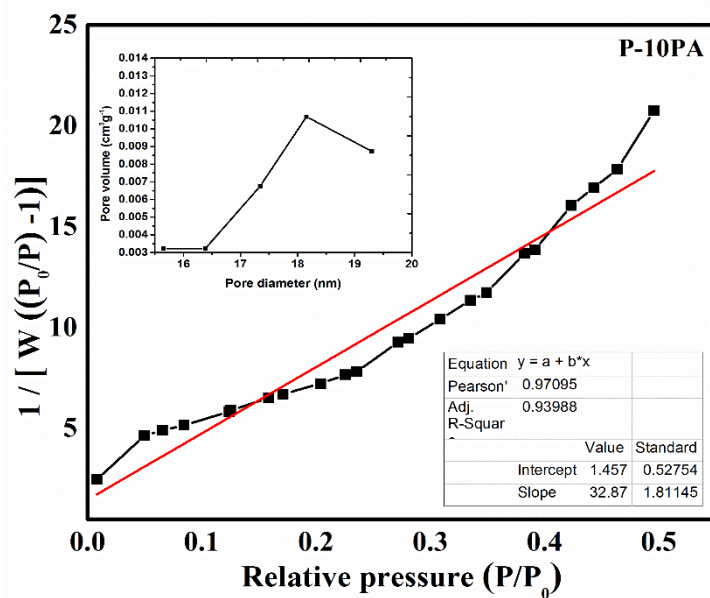

**Figure S4.** Nitrogen adsorption Curve of PANI-S6 while the inset curve shows pore size distribution and pore volume.

### 3. Results of the EDX-Mapping

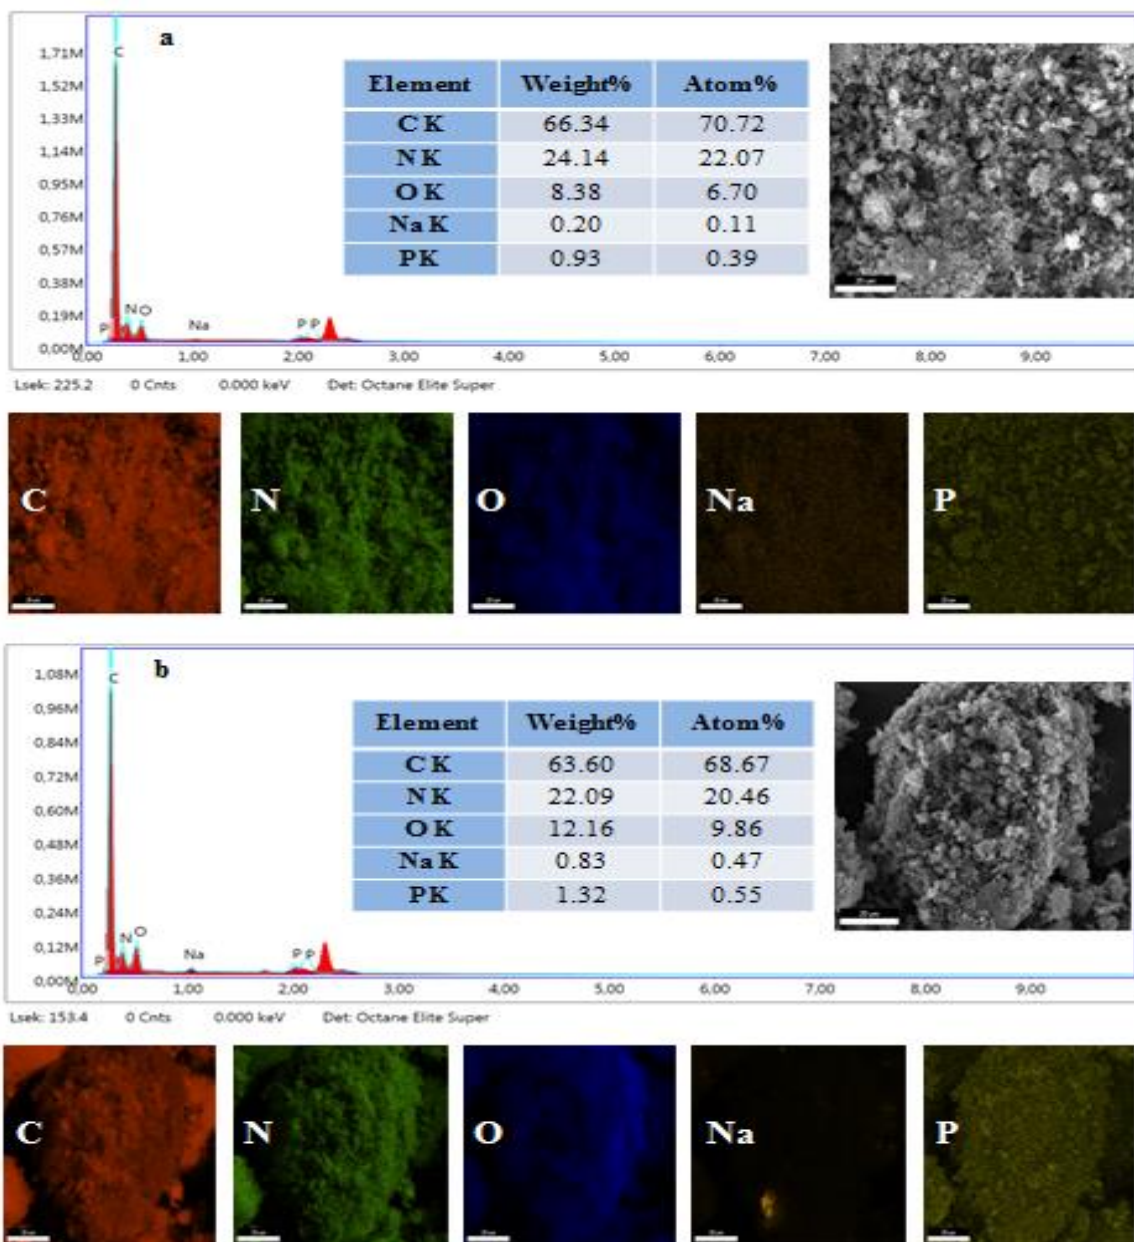

Figure S5: EDX and EDX-mapping of a) P-0.5PA and b) P-1PA

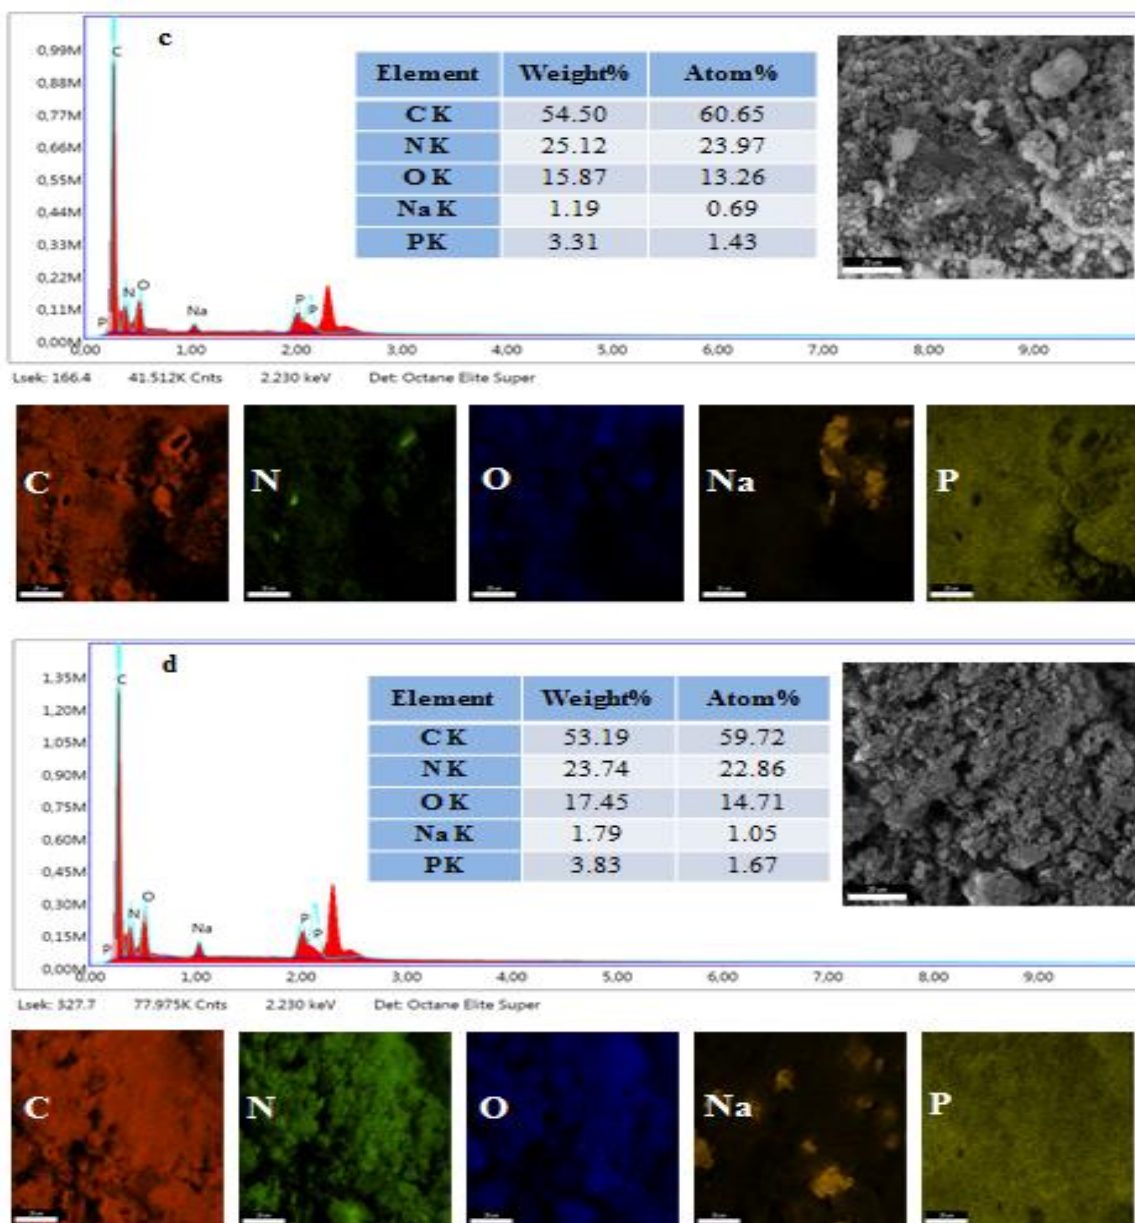

Figure S6: EDX and EDX-mapping of c) P-3PA and b) P-5PA



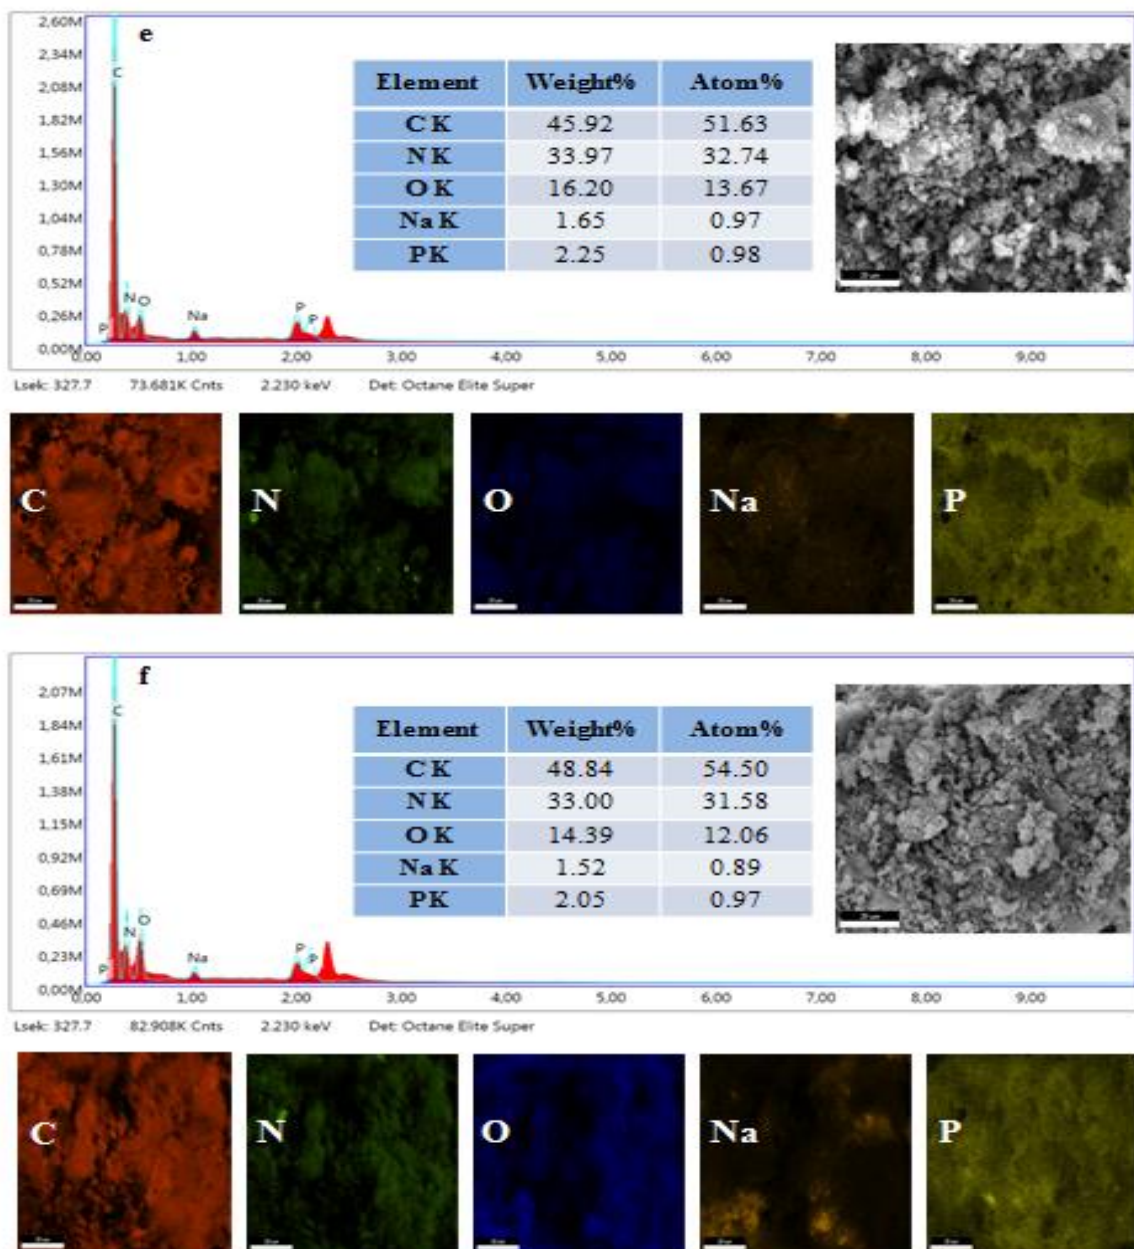

**Figure S7:** EDX and EDX-mapping of e) P-7PA and f) P-10PA

**Table S2:** Comparison of the Specific Capacitance of PANI and PANI based materials in three electrode system.

| Materials                 | Current Density      | Capacitance            | Electrolyte                          | Year | Reference |
|---------------------------|----------------------|------------------------|--------------------------------------|------|-----------|
| PANI                      | 0.5 Ag <sup>-1</sup> | 712 Fg <sup>-1</sup>   | 1 M H <sub>2</sub> SO <sub>4</sub>   | 2019 | [15]      |
| Cl-PANI NFs               | 30 Ag <sup>-1</sup>  | 105 Fg <sup>-1</sup>   | 0.1 M HCl                            | 2019 | [54]      |
| PhA-PANI NFs              | 30 Ag <sup>-1</sup>  | 227 Fg <sup>-1</sup>   | 0.1 M HCl                            | 2019 | [54]      |
| Carbon coated PANI        | 1 Ag <sup>-1</sup>   | 783 Fg <sup>-1</sup>   | 1 M H <sub>2</sub> SO <sub>4</sub>   | 2019 | [62]      |
| Honeycomb like PANI       | 1 Ag <sup>-1</sup>   | 480 Fg <sup>-1</sup>   | 1 M H <sub>2</sub> SO <sub>4</sub>   |      |           |
| PANI nanocomposite        | 1 Ag <sup>-1</sup>   | 626 Fg <sup>-1</sup>   | 0.5 M H <sub>2</sub> SO <sub>4</sub> |      |           |
| PANI nanocomposite        | 10 Ag <sup>-1</sup>  | 475 Fg <sup>-1</sup>   | 0.5 M H <sub>2</sub> SO <sub>4</sub> |      |           |
| Sodium phytate doped PANI | 1 Ag <sup>-1</sup>   | 832.5 Fg <sup>-1</sup> |                                      |      |           |

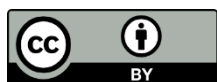

© 2020 by the authors. Submitted for possible open access publication under the terms and conditions of the Creative Commons Attribution (CC BY) license (<http://creativecommons.org/licenses/by/4.0/>).
